# Supplementary material for: Symmetry of computerised tomography of the brain in traumatic brain injury: a quality improvement audit
Source: Springer Nature journal article supplement (doi:10.1186/s12883-023-03441-x), 2023-10-31
Supplement: MOESM1 [file 26245822]

**Supplementary Material:**

**Checklist for CT brain study**

|                                                                                                                                                                            |                                     |
|----------------------------------------------------------------------------------------------------------------------------------------------------------------------------|-------------------------------------|
| Ensure Horizontal and Vertical Laser marker lines of the CT machine intersect at the Glabella.                                                                             | <input checked="" type="checkbox"/> |
| Horizontal marker line should superimpose on the bilateral supraorbital ridge, and the vertical marker line should be in the midline, and both the lines should intersect. | <input type="checkbox"/>            |
| Patient should be immobile.                                                                                                                                                | <input type="checkbox"/>            |
| Ensure safe and adequate sedation if needed.                                                                                                                               | <input type="checkbox"/>            |
